# Supplementary material for: Are Bacterio- and Phytoplankton Community Compositions Related in Lakes Differing in Their Cyanobacteria Contribution and Physico-Chemical Properties?
Source: MDPI journal article supplement (doi:10.3390/genes12060855), 2021-06-02
Supplement: s1 [file s1]

| Lake                      | Surface<br>[ha] | Mean<br>depth<br>[m] | Max.<br>depth<br>[m] | pH   | Secchi<br>depth<br>[m] | Cond.<br>[ $\mu\text{S cm}^{-1}$ ] | Temp.<br>[ $^{\circ}\text{C}$ ] | Chlorofil<br>a [ $\mu\text{g L}^{-1}$ ] | N-NO3<br>[ $\text{mg L}^{-1}$ ] | P-PO4<br>[ $\text{mg L}^{-1}$ ] |
|---------------------------|-----------------|----------------------|----------------------|------|------------------------|------------------------------------|---------------------------------|-----------------------------------------|---------------------------------|---------------------------------|
| <b>CyanoDominantLakes</b> |                 |                      |                      |      |                        |                                    |                                 |                                         |                                 |                                 |
| Kierskie Małe             | 26.0            | 1.4                  | 2.3                  | 8.74 | 0.6                    | 852                                | 16.8                            | 101.04                                  | 0.06                            | 0.13                            |
| Zbąszyńskie               | 742.5           | 3.5                  | 9.6                  | 8.56 | 0.4                    | 755                                | 16.2                            | 101.31                                  | 0.19                            | 0.001                           |
| Niepruszewskie            | 227.5           | 3.1                  | 5.2                  | 8.65 | 0.6                    | 722                                | 17.5                            | 35.92                                   | 1.1                             | 0.09                            |
| Bnińskie                  | 221.5           | 4.0                  | 8.5                  | 8.33 | 0.8                    | 663                                | 16.8                            | 105.49                                  | 0.05                            | 0.08                            |
| Raczyńskie                | 93.5            | 2.7                  | 5.8                  | 8.9  | 0.2                    | 505                                | 16.8                            | 107.32                                  | 0.08                            | 0.2                             |
| Grzymisławskie            | 180.1           | 3.0                  | 11.2                 | 8.38 | 0.9                    | 870                                | 17.8                            | 80.72                                   | 0.04                            | 0.07                            |
| Dolskie Wielkie           | 166.6           | 1.2                  | 3.0                  | 8.98 | 0.4                    | 642                                | 18.5                            | 77.92                                   | 0.07                            | 0.12                            |
| Żnińskie Małe             | 122.5           | 2.3                  | 5.3                  | 8.9  | 0.45                   | 706                                | 22.7                            | 150.16                                  | 0.04                            | 0.12                            |
| Mogileńskie               | 72.5            | 3.2                  | 6.8                  | 9.02 | 0.4                    | 585                                | 24.5                            | 93.23                                   | 0.96                            | 0.001                           |
| Miejskie                  | 44.0            | 1.5                  | 6.4                  | 8.97 | 0.4                    | 537                                | 25.6                            | 108.68                                  | 0.24                            | 0.001                           |
| Pniewskie                 | 55.0            | 1.5                  | 3.3                  | 8.79 | 0.55                   | 508                                | 24.7                            | 30.47                                   | 0.001                           | 0.001                           |
| Bytyńskie                 | 308.8           | 3.5                  | 7.5                  | 7.78 | 0.5                    | 786                                | 24.3                            | 73.16                                   | 0.04                            | 0.001                           |
| Swarzędzkie               | 94.0            | 2.3                  | 6.5                  | 8.8  | 0.5                    | 639                                | 19.8                            | 184.75                                  | 0.05                            | 0.001                           |
| Strzyżewskie              | 48.9            | 5.8                  | 13.3                 | 8.51 | 0.7                    | 632                                | 19.1                            | 69.49                                   | 0.06                            | 0.001                           |
| Biskupińskie              | 107.4           | 5.5                  | 13.5                 | 8.71 | 0.7                    | 775                                | 20.3                            | 72.29                                   | 0.04                            | 0.001                           |
| Grylewskie                | 98.0            | 3.6                  | 6.5                  | 8.42 | 0.7                    | 832                                | 22.7                            | 53.11                                   | 2.3                             | 0.001                           |
| <b>CyanoMinorLakes</b>    |                 |                      |                      |      |                        |                                    |                                 |                                         |                                 |                                 |
| Buszewskie                | 79.8            | 4.8                  | 14.0                 | 9.04 | 0.8                    | 601                                | 24.5                            | 57.69                                   | 0.04                            | 0.001                           |
| Lubieckie                 | 47.5            | 4.9                  | 8.6                  | 8.74 | 1.7                    | 559                                | 25.2                            | 7.33                                    | 0.2                             | 0.001                           |
| Borówie                   | 5.0             | 2.4                  | 5.0                  | 8.49 | 1.1                    | 505                                | 23                              | 13.11                                   | 0.03                            | 0.001                           |
| Głębokie                  | 25.2            | 2.1                  | 6.0                  | 8.43 | 1.7                    | 803                                | 20.9                            | 15.77                                   | 1.32                            | 0.02                            |
| Winiary                   | 19.0            | 3.5                  | 6.0                  | 8.8  | 0.4                    | 603                                | 20.4                            | 120.43                                  | 0.04                            | 0.001                           |
| Rusałka                   | 37.0            | 1.9                  | 9.0                  | 8.72 | 0.9                    | 774                                | 17.5                            | 3.61                                    | 0.04                            | 0.04                            |
| Lusowskie                 | 121.9           | 8.6                  | 19.5                 | 8.62 | 3                      | 720                                | 18.7                            | 11.2                                    | 0.06                            | 0.04                            |
| Wolsztyńskie              | 116.0           | 2.0                  | 4.2                  | 8.91 | 0.8                    | 518                                | 14.8                            | 72.32                                   | 0.2                             | 0.001                           |
